# **Glutathione regulates subcellular iron homeostasis via transcriptional activation of iron responsive genes in Arabidopsis**

**Ranjana Shee<sup>1,2</sup>, Soumi Ghosh<sup>1,\$</sup>, Pinki Khan<sup>1,\$</sup>, Salman Sahid<sup>1,2</sup>, Chandan Roy<sup>2</sup>, Dibyendu Shee<sup>2</sup>, Soumitra Paul<sup>2\*</sup>, Riddhi Datta<sup>1\*</sup>**

<sup>1</sup>Department of Botany, Dr A. P. J. Abdul Kalam Government College, New Town, Kolkata 700156

<sup>2</sup>Department of Botany, University of Calcutta, 35, Ballygunge Circular Road, Kolkata 700019, West Bengal, India

Email addresses:

Ranjana Shee: [ranjana.shee22@gmail.com](mailto:ranjana.shee22@gmail.com), Soumi Ghosh: [soumimpplab@gmail.com](mailto:soumimpplab@gmail.com), Pinki Khan: [pinkimpplab@gmail.com](mailto:pinkimpplab@gmail.com), Salman Sahid: [salmansahid1991@gmail.com](mailto:salmansahid1991@gmail.com), Chandan Roy: [suchandan.roy35@gmail.com](mailto:suchandan.roy35@gmail.com), Dibyendu Shee: [dibyendushee01@gmail.com](mailto:dibyendushee01@gmail.com), Soumitra Paul: [psoumitra@ymail.com](mailto:psoumitra@ymail.com), Riddhi Datta: [riddhi.bot@gmail.com](mailto:riddhi.bot@gmail.com)

\*Authors for correspondence:

Email: [psoumitra@ymail.com](mailto:psoumitra@ymail.com), [riddhi.bot@gmail.com](mailto:riddhi.bot@gmail.com); Telephone No: +919748605305, +919433084074

<sup>\$</sup>These authors contributed equally

Date of submission: 09.05.2021

Number of figures: 10; colour in on-line: 3

Word count: 4378

Total Supplementary Data: 9, Supplementary Figures: 7, Supplementary Tables: 2

Running title: **GSH regulates subcellular iron homeostasis in Arabidopsis**

## **Highlight**

Glutathione regulates subcellular iron homeostasis under iron deficiency via GSNO dependent transcriptional activation of *AtNRAMP3*, *AtNRAMP4*, *AtPIC1*, *AtFer1* and *AtIRT1* genes presumably by S-nitrosylation of different iron responsive bHLH factors.

# Abstract

Glutathione (GSH) is a ubiquitous molecule known to regulate various physiological and developmental phenomena in plants. Recently, its involvement in regulating iron (Fe) deficiency response was established in Arabidopsis. However, the role of GSH in modulating subcellular Fe homeostasis remained elusive. In this study, we dissected the role of GSH in regulating Fe homeostasis in Arabidopsis shoots under Fe limited conditions. The two GSH depleted mutants, *cad2-1* and *pad2-1* displayed increased sensitivity to Fe deficiency with smaller rosette diameter and higher chlorosis level compared with the Col-0 plants. Interestingly, the expression of the vacuolar Fe exporters, *AtNRAMP3* and *AtNRAMP4*, chloroplast Fe importer, *AtPIC1*, along with *AtFer1* and *AtIRT1* were significantly down-regulated in these mutants. The expression of these genes were up-regulated in response to exogenous GSH treatment while treatment with BSO, a GSH inhibitor, down-regulated their expression. Moreover, the mutants accumulated higher Fe content in the vacuole and lower in the chloroplast compared with Col-0 under Fe limited condition suggesting a role of GSH in modulating subcellular Fe homeostasis. This regulation was, further, found to involve a GSNO-dependent pathway. Promoter analysis revealed that GSH induced the transcription of these genes presumably via S-nitrosylation of different Fe responsive bHLH transcription factors.

**Keywords:** Glutathione, iron deficiency, subcellular iron homeostasis, GSNO, NRAMP, PIC, ferritin

51

## 52 Introduction

53 Iron (Fe) is an essential micronutrient for plant growth and development. It plays an  
54 important role in regulating numerous cellular responses because of its physicochemical  
55 properties. This micronutrient is known to coordinate metalloprotein active sites and regulate  
56 many important enzymatic reactions required for nitrogen fixation, DNA synthesis and  
57 biosynthesis of various phytohormones (Briat *et al.*, 2015). Although Fe is found abundantly  
58 in the earth's crust, it is usually present in an oxidized form and its availability to plants is  
59 limited. The deficiency of Fe in plants causes chlorosis and perturbs photosynthesis and  
60 oxidative phosphorylation by hampering different electron carriers of photosynthetic  
61 machineries as well as mitochondrial electron transport system. Therefore, Fe deficiency is a  
62 challenging issue for plant growth, development and productivity.

63 Plants have evolved highly sophisticated mechanisms for Fe uptake and transport. Two basic  
64 strategies for Fe uptake are described in the gramineous and non-gramineous plants  
65 (Morrissey and Guerinot, 2009). Among them, the strategy I or reduction based strategy is  
66 found in the non-gramineous plants like *Arabidopsis* where the plasmamembrane  $H^+$ -  
67 ATPases (AHAs) release protons to increase rhizosphere acidification. This promotes the  
68 reduction of  $Fe^{3+}$  to the more soluble  $Fe^{2+}$  by ferric reductase oxidase 2 (FRO2) (Robinson *et al.*, 1999). Iron regulated transporter 1 (IRT1), a member of the ZIP metal transporter family,  
69 imports the reduced  $Fe^{2+}$  into the root cells (Vert *et al.*, 2002). Also, shoot specific FRO7  
70 plays an important role in Fe delivery to chloroplasts. Besides, FRO3 and FRO8, present in  
71 the mitochondrial membrane, also regulate Fe homeostasis in mitochondria (Jeong and  
72 Connolly, 2009).

74 Modulating intracellular Fe homeostasis is crucial particularly under altered Fe conditions  
75 and involves several Fe transporters. A high-affinity Fe transporter, natural resistance against  
76 macrophage protein (NRAMP), having significant similarity with its mammalian counterpart,  
77 was identified in *A. thaliana* (Curie *et al.*, 2000). Although their functional role in plants was  
78 not entirely revealed, complementation assays in yeast showed that these proteins were  
79 induced under Fe deficient condition. NRAMP 1, 3 and 4 represent multi-specific metal  
80 transporters localized in roots and leaves (Curie *et al.* 2000; Thomine *et al.* 2003; Lanquar *et al.*, 2005). In *Arabidopsis*, NRAMP3 and NRAMP4 were identified to retrieve and export Fe  
81 from vacuoles to chloroplast during the Fe deficient condition (Bastow *et al.*, 2018). In fact,  
82 the vacuolar Fe released by these two transporters was found to be the primary source of Fe  
83

84 in germinating seeds (Bastow *et al.*, 2018). On the other hand, vacuolar iron transporter 1  
85 (VIT1) was identified as one of the key transporters involved in Fe influx into the vacuole. It  
86 thus functions in the vacuolar sequestration process essential for detoxification under the  
87 excess Fe condition (Kim *et al.*, 2006). In plants, maintaining the plastidal Fe homeostasis is  
88 crucial for survival. Several Fe transporters like permease in chloroplasts 1 (PIC1), non-  
89 intrinsic ABC protein 11 (NAP11) and NAP14 were identified as Fe importers that transport  
90 Fe across the chloroplast envelope (Duy *et al.*, 2007; Shimoni-Shor *et al.*, 2010). On the other  
91 hand, several transporters like yellow stripe like 1 (YSL1) and YSL3 help in maintaining Fe  
92 homeostasis by regulating Fe efflux from the chloroplast (Waters *et al.*, 2006; Chu *et al.*,  
93 2010).

94 Glutathione (GSH) is a multifunctional metabolite that has drawn extensive attention due to  
95 its unique structural properties, abundance, broad redox potential, and wide distribution in  
96 most living organisms. Along with ascorbate, GSH is considered as one of the most abundant  
97 redox couples in plant cells (Foyer and Halliwell, 1976). In plants, GSH is known to play a  
98 pivotal role in regulating stress responses as well as growth and development. Phenotypic  
99 analysis of GSH deficient Arabidopsis mutants demonstrated that GSH was essentially  
100 required for plant development, particularly embryo and meristem development (Vernoux *et al.*  
101 *et al.*, 2000; Cairns *et al.*, 2006; Reichheld *et al.*, 2007; Frotin *et al.*, 2009; Bashandy *et al.*,  
102 2010). The *rm11* mutant, which was severely deficient in GSH, developed non-functional root  
103 meristem while the shoot meristem remained largely unaffected (Vernoux *et al.*, 2000). In  
104 addition to serving as a source of reduced sulfur during secondary metabolite biosynthesis,  
105 GSH was widely reported to play crucial role in plant defense signalling network. Ball *et al.*  
106 (2004) reported that several stress responsive genes were altered due to changed GSH  
107 metabolism in *A. thaliana rax1-1* and *cad2-1* mutants of GSH biosynthesis enzyme. Another  
108 GSH deficient mutant, *pad2-1*, was demonstrated to be susceptible to *Pseudomonas syringae*  
109 as well as *P. brassicae* infections (Glazebrook and Ausubel, 1994; Glazebrook *et al.*, 1997;  
110 Parisy *et al.*, 2007; Datta and Chattopadhyay, 2015). Besides, GSH was shown to be involved  
111 in the modulation of NPR1-dependent and independent salicylic acid signalling pathways  
112 (Ghanta *et al.*, 2011; Han *et al.*, 2013). Subsequently it was reported that GSH induces  
113 ethylene biosynthetic pathway via transcriptional as well as post transcriptional regulation of  
114 the key enzymes (Datta *et al.*, 2015).

Again, GSH exhibits a wide range of metal chelating activities and plays important role to reduce metal toxicity in plants. Detoxification of heavy metals within plant cell occurs via phytochelatins (PCs) that are synthesized from GSH by the enzyme phytochelatin synthase (Grill *et al.*, 1989; Clemens *et al.*, 1999; Vatamaniuk *et al.*, 1999). On cadmium or copper exposure *A. thaliana* plants responded by increasing the transcription of *glutathione synthetase* and *glutathione reductase* (GR) genes which were involved in GSH synthesis and reduction respectively (Queval *et al.*, 2009). Further, the involvement of GSH was reported in combating metal toxicity against arsenic stress in maize (Requejo and Tena, 2012), chromium toxicity in rice (Zeng *et al.*, 2012; Qiu *et al.*, 2013) and cadmium stress in *Pinus* and *A. thaliana* (Schützendübel *et al.*, 2001; Jobe *et al.*, 2012). Cross-talk of GSH with zinc and Fe homeostasis was also reported (Shanmugam *et al.*, 2012). In another study, GSH was reported to trigger the upregulation of genes related to Fe uptake and transport and to increase the Fe concentration in *A. thaliana* seedlings under Fe deficiency (Koen *et al.*, 2012). GSH-ascorbate redox cycle was studied against Fe deficiency as well (Ramírez *et al.*, 2013). Previous studies demonstrated the association of GSH in maturation of Fe-S molecule and transport of dinitrosyl-Fe complexes in plants (Hider and Kong, 2011; Kumar *et al.*, 2011). GSH also served as the reservoir of nitric acid (NO) by formation of S-nitrosoglutathione (GSNO) complex which helped in NO mediated signalling including Fe deficiency responses (Chen *et al.*, 2010; Ramirez *et al.*, 2011). Subsequently, Shanmugam *et al.* (2015) revealed the role of GSH in enhancement of Fe deficiency tolerance in plants. The activities of several Fe related transporters like *AtIRT1*, *AtFRO2* and *AtFIT* was reduced in *zir1*, a GSH depleted mutant of Arabidopsis, compared to the wild-type (WT). This observation attributed the role of GSH in regulation of Fe transport under Fe-limiting condition. However, the involvement of GSH in modulating subcellular Fe homeostasis in shoot has not been elucidated so far.

In this study, we report that the two GSH depleted mutants, *cad2-1* and *pad2-1* displayed increased sensitivity towards Fe deficiency. Several organellar Fe transporters, viz. *AtNRAMP3*, *AtNRAMP4*, *AtPIC1* as well as *AtFer1* were found to be down-regulated in both the mutants in addition to *AtIRT1*. This GSH mediated regulation involved transcriptional activation of the identified genes presumably via S-nitrosylation of different Fe responsive bHLH transcription factors.

## Materials and methods:

### *Plant growth, stress treatment and morphological analysis*

The seeds of *A. thaliana* Columbia ecotype (Col-0) along with 2 GSH depleted mutants, *cad2-1* and *pad2-1*, were procured from Nottingham Arabidopsis Stock Centre, UK. The seeds were inoculated in MS medium (Murashige and Skoog, 1962) after surface sterilization with 4 % sodium hypochlorite and Tween 20. The plants were maintained at 21°C with 60 % relative humidity and a photoperiod of 16 h light/8 h dark cycles (Datta *et al.*, 2015).

The 7 d old seedlings were transferred to either minimal iron (MI) or depleted iron (DI) medium and maintained for 7 d. The MI medium contained 10 µM Fe in contrast to 100 µM Fe in the MS medium. For preparation of DI medium, the Fe salt was omitted from MS medium keeping all other components unaltered. In addition, 300 µM ferrozine [3-(2-pyridyl)-5,6-diphenyl-1,2,4- triazine sulfonate] was also added to remove any trace amount of Fe from the medium (Eroglu *et al.*, 2016). For control set, seedlings were maintained in MS medium for the entire period. After 7 d of stress treatment, the morphological parameters including primary root length, lateral root density and rosette diameter were measured using Image J software.

#### *RNA extraction and quantitative-RT PCR analysis*

Total RNA was isolated from the tissue samples by Trizol method. Complementary DNA (cDNA) was prepared subsequently using iScript™ cDNA Synthesis Kit (Bio-rad) following manufacturer's protocol. Quantitative PCR amplification was carried out in CFX96 Touch™ Real-Time PCR Detection System (Bio-rad) using iTaq™ Universal SYBR® Green Supermix (Bio-rad) and gene specific primers (Supplementary Table S1). *AtActin2* was used as a reference gene to normalize the relative expression and *AtIRT1* was used as Fe-responsive marker gene to confirm the Fe deficient conditions.

#### *Chemical treatment of seedlings*

15 d old seedlings were used for chemical treatments. For GSH feeding, freshly prepared 100 µM GSH was used while for BSO treatment, 1 mM BSO was used for 72 h as standardized before (Datta *et al.*, 2015). For DTT treatment, a 5 mM DTT solution was used for 24 h treatment. In case of GSNO feeding, the seedlings were treated with 250 µM GSNO for 72 h (Kailasham *et al.*, 2018). For tungstate treatment, seedlings were treated with 1 mM sodium tungstate for 72 h (Chen *et al.*, 2010). Control seedlings were maintained in half strength MS medium.

#### *Estimation of Fe content*

Fe content from different tissues was measured through dry ash digestion method with slight modifications (Jiang *et al.*, 2007). Briefly, tissues were harvested from 15 d old seedlings, washed with HPLC grade water, pat dried, weighed and used for ash preparation. The ash was digested with 0.5 M HNO<sub>3</sub> and filtered through Whatman no. 42 filters. The solution was again filtered through Millex® GV 0.22 µm PVDF membrane filter (Merck Millipore). The Fe content was analysed using ICP-OES (iCAP 6300 Duo ICP-OES, Thermo Scientific).

#### *Estimation of Chlorophyll content*

The chlorophyll content was estimated following Lichtenthaler (1987). Briefly, 200 mg tissue was homogenized in 80 % acetone, followed by centrifugation at 5000 g for 5 min. The supernatant was used for the estimation of total chlorophyll.

#### *Estimation of total GSH content and GSH:GSSG ratio*

GSH estimation was performed following Anderson (1985). Briefly, 200 mg of tissue was homogenized in 5 % sulphosalicylic acid followed by centrifugation at 12000 g for 20 min. GSH was estimated from the supernatant by 5,5'-dithiobis-(2-nitrobenzoic acid) (DTNB) method. For estimation of total GSH, 0.4 mM NADPH and GR were added to the reaction buffer. Optical density was measured at 412 nm using a Double Beam UV-Vis Spectrophotometer (U2900, Hitachi). Amount of GSSG was calculated by subtracting GSH amount from total GSH.

#### *Isolation of chloroplast and vacuole*

Chloroplast was isolated from leaves as standardized before (Kleffmann *et al.*, 2004; Ghanta *et al.*, 2014). Briefly, leaves were finely chopped in chloroplast extraction buffer (0.3 M sorbitol, 1 mM MgCl<sub>2</sub>, 50 mM HEPES/KOH, 2 mM EDTA, 0.04 % β-mercaptoethanol, 0.1 % PVPP, pH 7.8), filtered and centrifuged at 4 °C for 10 min at 1300 g. The pellet was suspended in isolation buffer (0.3 M sorbitol, 1 mM MgCl<sub>2</sub>, 50 mM HEPES/KOH, 2 mM EDTA, pH 7.8). The solution was loaded on the top of percoll gradient and centrifuged at 4 °C and 8000 g for 20 min. Intact chloroplasts were isolated and washed twice with the isolation buffer.

Vacuoles were isolated from leaves following Zouhar (2016). Briefly, leaves were collected, weighed, cut with razor blade into 2 mm strips and immersed in the protoplast isolation buffer [(1 % (w/v) Cellulase R10, 1 % (w/v) Macerozyme R10, 0.4 M mannitol, 25 mM

CaCl<sub>2</sub>, 5 mM β-mercaptoethanol, 10 mM 2-[N-morpholino]ethanesulfonic acid (MES)-KOH, (pH 5.7)]. The solution was then infiltrated and incubated for 4 h at room temperature with continuous shaking. The released protoplasts were filtered followed by centrifugation at 80 g at 20 °C for 15 min. 10 % Ficoll buffer was added to the pellet for protoplast disruption. The lysed protoplast solution was then treated with 4 % Ficoll buffer followed by vacuole isolation buffer (0.45 M mannitol, 5 mM sodium phosphate, 2 mM EDTA, pH 7.5). The solution was then ultracentrifuged at 50,000 g for 50 min at 10 °C. Vacuoles were collected from the 4 % Ficoll buffer/vacuole buffer interface.

The isolated chloroplast and vacuole fractions were used for Fe estimation as described above.

#### *Fe localization by Perls prussian blue and DAB staining*

The Fe localization using Perls prussian blue staining technique was carried out following Rochhardt *et al.* (2009). Briefly, the plant samples were fixed in a 6:3:1 methanol:chloroform:acetic acid (v/v) solution and washed twice with ultrapure water. The plants were then transferred to the pre-warmed staining solution (4 % (w/v) K<sub>4</sub>Fe(CN)<sub>6</sub> and 4 % (v/v) HCl) and incubated at room temperature for 1 h. After removing the staining solution, the samples were washed twice with ultrapure water. For DAB intensification, the samples were incubated in preparation solution (0.01 M Na<sub>2</sub>CO<sub>3</sub> and 0.3 % H<sub>2</sub>O<sub>2</sub> in methanol) for 1 h. After washing with the 0.1 M phosphate buffer (pH 7) the samples were incubated in intensification solution (0.025 % (v/v) H<sub>2</sub>O<sub>2</sub> and 0.005 % (w/v) CaCl<sub>2</sub>) and kept at room temperature for 30 min. The samples were then washed with ultrapure water and photographed.

#### *Vector construction and raising of transformed Arabidopsis plants*

Genomic DNA was extracted from shoots following CTAB method. To clone the promoter regions of *AtIRT1*, *AtFer1*, *AtPIC1*, *AtNRAMP3* and *AtNRAMP4* genes, approximately 1.5 kb of intergenic region upstream of the transcription start site was amplified by PCR using gene specific primers (Supplementary Table S1). The amplified promoter regions were cloned into pCambia1304 between *Bam*HI and *Bgl*II restriction enzyme sites to generate *AtIRT1pro::GUS*, *AtNRAMP3pro::GUS* and *AtNRAMP4pro::GUS* constructs and between *Bam*HI and *Spe*I to produce *AtPIC1pro::GUS* and *AtFer1pro::GUS* constructs. These constructs were then transformed into Col-0 plants through *Agrobacterium* mediated floral

dip transformation method (Clough and Bent, 1998). A vector control line harbouring the *CaMV35S::GUS* construct was generated as well. The transformed lines harbouring the recombinant constructs were selected and maintained up to T<sub>2</sub> generations in a growth chamber as described above.

### *Histochemical GUS assay*

The seedlings from the transgenic lines harbouring the *AtIRT1pro::GUS*, *AtFer1pro::GUS*, *AtPIC1pro::GUS*, *AtNRAMP3pro::GUS*, *AtNRAMP4pro::GUS* and *CaMV35S::GUS* constructs were incubated under DI condition or fed with GSH and GSNO as described above. The samples were then infiltrated with GUS staining solution (0.5 mg mL<sup>-1</sup> 5-bromo-4-chloro-3-indolyl-β-D-glucuronic acid, 0.5 mM potassium ferrocyanide, 0.5 mM potassium ferricyanide, 0.1 % (v/v) Triton X-100, 100 mM phosphate buffer, pH 7.0, and 10 mM EDTA) following Jefferson *et al.* (1987). The stained samples were washed with 70 % ethanol and photographed.

### *In silico prediction of S-nitrosylation sites*

The 12 basic helix loop helix (bHLH) transcription factors (TFs) like *AtbHLH6*, *AtbHLH11*, *AtbHLH18*, *AtbHLH19*, *AtbHLH20*, *AtbHLH25*, *AtbHLH34*, *AtbHLH47* (POPEYE), *AtbHLH104*, *AtbHLH105*, *AtbHLH115*, and *AtbHLH121* were considered in this study and their protein sequences were retrieved from UniProt database (<http://www.uniprot.org/uniprot/>). These sequences were submitted to GPS-SNO 1.0 software to predict the presence of S-nitrosylated cysteine residues using threshold level as high (Xue *et al.*, 2010). The cysteine (cys/c) residues which undergo S-nitrosylation were considered as positive hits (+) while the non-nitrosylated cysteine residues were considered as negative hits (-). The enrichment for S-nitrosylated cysteine residues was depicted using CentriMo 5.3.3 web server (<https://meme-suite.org/meme/tools/centrimo>; Bailey and Machanick, 2012). In addition, the presence of bHLH TF binding motifs were identified in the promoter regions of *AtNRAMP3*, *AtNRAMP4*, *AtPIC1*, *AtIRT1* and *AtFER1* using PlantPan 3.0 (<http://plantpan.itps.ncku.edu.tw/promoter.php>) and MEME suite 5.3.3 (<https://meme-suite.org/>; Bailey *et al.*, 2009).

### *Statistical analysis*

Statistical analysis of the data was performed using GraphPad Prism version 8.3.0 software (GraphPad Software, San Diego, California USA). The variation of morphological, and

biochemical parameters as well as the relative transcript abundance among different samples were analyzed following two-way ANOVA followed by Sidak's multiple comparison tests. The statistical significance at  $P \leq 0.05$  was considered to determine the difference between two sets of data. Details of replicates, sample size, and the significance levels of P-values were indicated in respective figure legends. The data were represented as mean  $\pm$  standard error of mean (SEM).

## Results

### *GSH depleted mutants displayed increased sensitivity to Fe deficient conditions*

To explore if GSH plays a role in regulating Fe homeostasis, two GSH depleted mutants, *cad2-1* and *pad2-1*, containing only 40 % and 22 % GSH respectively, were selected for this study. The MS medium containing 100  $\mu$ M Fe was used as a control medium while the MI medium containing 10  $\mu$ M Fe and the DI medium lacking any Fe source and containing the Fe-chelator, ferrozine were used as Fe deficient media. Since, the expression of *AtIRT1* gene was found to be the highest after 7 d treatment, this time point was used for all downstream analyses (Supplementary Fig. S1). The mutant lines when grown under MI and DI conditions displayed increased sensitivity to Fe deficiency as compared with the Col-0 plants (Fig. 1). The rosette diameter was found to be significantly reduced in the mutants compared with the Col-0 plants after 7 d of treatment. In addition, the root morphology was also altered in response to Fe deficiency. The primary root length decreased in all 3 lines with the shortest root length in the *pad2-1* plants under both MI and DI conditions. Lateral root density was found to be considerably increased in all the 3 lines. Since Fe deficiency is widely known to affect the photosynthetic machinery, we estimated the total chlorophyll content. While all the 3 lines displayed chlorosis in response to Fe deficiency, the mutant lines showed significantly lower total chlorophyll content under both MI and DI conditions as compared with the Col-0 plants.

To determine any correlation between GSH and Fe contents, we also analyzed the total GSH content, GSH:GSSG ratio as well as the Fe content under control and Fe deficiency conditions. Interestingly, the mutant lines exhibited significantly lower Fe content in the shoot as well as the root as compared with Col-0 plants (Fig. 2A, D). The lower Fe content in the mutant lines was also visualized by Perls-DAB staining (Supplementary Fig. S2). On the other hand, the total GSH content increased under MI and DI conditions while the

GSH:GSSG ratio decreased. As expected, the mutant lines displayed lower GSH levels in both the shoot and the roots as compared with the Col-0 plants (Fig. 2B, C, E, F).

### *GSH played a crucial role in regulating Fe transporters and ferritin genes*

Since the GSH depleted mutants were sensitive to Fe deficiency, the next pertinent point was to identify the Fe transporters that might be regulated by GSH. To this end, the expression of the Fe transporter genes were analyzed in the mutant lines and compared with the Col-0 plants. Interestingly, it was found that the expression of *AtNRAMP3*, *AtNRAMP4*, *AtPIC1* and *AtIRT1* genes were significantly down-regulated in the mutant lines as compared with the Col-0 plants (Fig. 3). On the other hand, the expression of *AtYSL1* and *AtYSL3* genes were found to be up-regulated in the mutant lines. Besides, several genes involved in regulating Fe homeostasis were also analyzed. Among them, *AtFer1* gene was found to be significantly down-regulated in the mutant lines as compared with the Col-0 (Fig. 4). This observation strongly suggested the involvement of GSH in modulating Fe homeostasis in plants. Since the *AtNRAMP3*, *AtNRAMP4*, *AtPIC1*, *AtFer1* and *AtIRT1* genes are known to be induced by Fe deficiency, we checked their expression under DI condition. It was found that under DI condition as well, the relative transcript abundance for all these genes were significantly lower in the mutant lines further supporting the previous observations (Fig. 5).

### *Exogenously altered GSH level was sufficient to regulate Fe responsive gene expression*

To further confirm the GSH-mediated regulation of the identified Fe responsive genes, Col-0 seedlings were exogenously treated with GSH or an inhibitor of GSH biosynthesis, BSO. In addition, a non-specific reducing agent DTT was also used for treatment. A half strength MS medium was used as a control set. To confirm the efficiency of the feeding treatments, total GSH content was estimated from each set. The total GSH level was found to be significantly increased in the GSH-fed plants, decreased in the BSO-fed plants while no significant alteration was observed in the DTT-fed plants (Fig. 6A). Next, the relative transcript abundance of the identified genes was analyzed. It was observed that the expression of the *AtNRAMP3*, *AtNRAMP4*, *AtPIC1* and *AtIRT1* transporters along with the *AtFer1* gene were induced in response to GSH feeding while the expression was decreased in response to BSO treatment (Fig. 6B-F). The DTT feeding, however, failed to significantly alter the expression levels thus indicating that non-specific reducing condition was not sufficient for this regulation.

Since the *pad2-1* mutant is severely deficient in GSH content, we supplemented these mutant seedlings with exogenous GSH or DTT. It was observed that only GSH supplementation, and not DTT feeding, could compensate for its deficiency and resulted in an increased expression of the identified Fe responsive genes (Supplementary Fig. S3).

#### *GSH modulated subcellular Fe homeostasis under Fe depleted condition*

The Fe transporters *AtNRAMP3* and *AtNRAMP4* are vacuolar exporters for Fe while the *AtPIC1* is responsible for Fe influx into the chloroplast. In addition, *AtFer1* acts as a major Fe accumulator in the chloroplast. Since GSH was found to regulate the expression of all of these genes, it was hypothesized that GSH might be involved in modulating the subcellular Fe homeostasis under Fe deficient condition. To dissect this, the organellar Fe content was estimated from the *cad2-1* and *pad2-1* mutants along with the Col-0 plants under both control and DI conditions. It was observed that the chloroplast Fe content was significantly lower in the mutant lines as compared with the Col-0 plants under control as well as DI conditions (Fig. 7A). On the other hand, the vacuolar Fe content was lower in the mutants under control condition but higher under DI condition as compared with the Col-0 plants (Fig. 7B). This observation suggested that the mutant lines with depleted GSH levels failed to efficiently export the Fe from vacuoles and channelize them into the chloroplast under DI condition. The lower vacuolar Fe content in the mutants under control condition could be attributed to their lower *AtIRT1* expression and subsequent impaired Fe uptake.

#### *GSH mediated regulation of Fe homeostasis involved GSNO*

Since the association of GSH with GSNO is known in regulating Fe deficiency response, we were curious if this GSH mediated modulation of subcellular Fe homeostasis also involved GSNO. Therefore, the Col-0 and *pad2-1* plants were treated with GSH and GSNO in combination with their inhibitors and DI condition. The expression of *AtNRAMP3*, *AtNRAMP4*, *AtPIC1*, *AtIRT1* and *AtFER1* genes were then analyzed. When Col-0 plants were treated with GSH or GSNO under DI condition, stronger induction of the genes was observed as compared with DI condition alone (Fig. 8). Treating the plants with GSNO along with the GSH inhibitor, BSO under DI condition did not display this effect. Yet again, plants treated with GSH in combination with the nitrate reductase inhibitor, tungstate failed to induce the gene expression even under DI condition. These observations suggested that the GSH mediated regulation of the identified Fe responsive genes occurred in a GSNO-dependent manner. Similarly, in case of *pad2-1* mutant, the treatment with GSH or GSH-tungstate

combination under DI condition showed a similar trend like that of Col-0 plants. On contrary, GSNO treatment under DI condition failed to augment gene expression indicating that GSNO alone was not sufficient to trigger the expression of these genes under the GSH depleted condition.

# *GSH triggered promoter activation of the Fe responsive genes*

Since GSH modulated the relative transcript abundance for the identified Fe responsive genes, it was assumed that a probable transcriptional regulation might be involved. To identify the mechanism of this regulation, transgenic lines harboring the *AtNRAMP3pro::GUS*, *AtNRAMP4pro::GUS*, *AtPIC1pro::GUS*, *AtFer1pro::GUS* and *AtIRT1pro::GUS* constructs were generated (Supplementary Fig. S4). A transgenic line harboring the *CaMV35S::GUS* construct was used as a negative control. The promoter activities in response to GSH and GSNO treatment were analyzed by histochemical GUS assay. The DI condition was used as a positive control for these treatments. The GUS activity in all the transgenic lines was found to be induced in response to both GSH and GSNO treatments which was also supported by the relative transcript abundance of the *GUS* gene (Fig. 9). On contrary, the GUS activity as well as its expression was unaltered in the *CaMV35S::GUS* containing negative control line. This observation strongly suggested that the GSH mediated regulation of these Fe responsive genes occurred via transcriptional activation.

# *GSH mediated transcriptional induction presumably involved S-nitrosylation of Fe-responsive TFs*

Seventeen bHLH TFs are known to be involved in the transcriptional regulation of various Fe responsive genes (Gao *et al.*, 2019; 2020). Among them, the *AtFIT*, *AtbHLH38*, *AtbHLH39*, *AtbHLH100*, and *AtbHLH101*, were reported to be regulated directly or indirectly by GSNO (Meiser *et al.*, 2011; Kailasham *et al.*, 2018). This made us curious to check if the other known Fe responsive TFs were also regulated in a GSNO-dependent fashion. Therefore, the 12 known Fe responsive bHLH TFs, viz. *AtbHLH6*, *AtbHLH11*, *AtbHLH18*, *AtbHLH19*, *AtbHLH20*, *AtbHLH25*, *AtbHLH34*, *AtbHLH47* (POPEYE), *AtbHLH104*, *AtbHLH105*, *AtbHLH115*, and *AtbHLH121* were selected for this study and screened for probable S-nitrosylation sites using the GPS-SNO 1.0 software. Among them, *AtbHLH11*, and *AtbHLH34* were found to contain 2 putative S-nitrosylation sites while *AtbHLH6*, *AtbHLH18*, *AtbHLH19*, *AtbHLH105*, and *AtbHLH115* contained 1 putative S-nitrosylation

site each (Supplementary Fig. S5; Supplementary Table S2). No sites were predicted in rest of the TFs. The enrichment analysis for the presence of *S*-nitrosylated cysteine residues in these TFs was performed as well (Supplementary Fig. S6). The bHLH TFs were reported to bind at the conserved E-box DNA binding (CANNTG) motif (Toledo-Ortiz *et al.*, 2003). Therefore, the promoter regions of *AtNRAMP3*, *AtNRAMP4*, *AtPIC1*, *AtIRT1* and *AtFer1* genes were analyzed for the presence of this conserved CANNTG motif. Interestingly, the promoters of all these identified Fe responsive genes contained the conserved E-box motif indicating their probable interaction with the bHLH TFs (Supplementary Fig. S7). Together, these observations suggested that the GSH mediated regulation of the identified Fe responsive genes presumably involved transcriptional modulation via these *S*-nitrosylated bHLH TFs.

## Discussion

In the last few decades the role of GSH in regulating multiple stress responses in plants was elaborately studied. Recently, emerging evidences suggested a positive role of GSH in mitigating Fe deficiency responses in plants (Koen *et al.*, 2012; Ramirez *et al.*, 2013). It was demonstrated that during Fe deficiency in *Arabidopsis*, the elevated level of GSH could significantly regulate different Fe responsive genes like *FRO2*, *IRT1*, *NAS4*, and *FIT1* to enhance Fe uptake and transport through roots (Koen *et al.*, 2012). Subsequently, this GSH mediated regulation was found to occur in a GSNO dependent manner (Garcia *et al.*, 2010, Shanmugam *et al.*, 2015; Kailasam *et al.*, 2018). However, the role of GSH in regulating subcellular Fe homeostasis in plants was not elucidated so far. In our previous study, comparative proteomic analysis of *pad2-1*, a GSH depleted mutant, revealed the down-accumulation of *AtFer1* protein in shoot as compared with the Col-0 plants (Datta *et al.*, 2015). This clue prompted us to investigate the role of GSH in regulating the expression of different Fe responsive genes in *Arabidopsis* shoot. Since ferritin is abundantly found in the chloroplast, we were also curious to identify any role of GSH in maintaining chloroplast Fe homeostasis. To begin with, we selected two GSH depleted mutants *cad2-1* and *pad2-1*, and analyzed their response under Fe limited conditions. Both the mutants displayed severe sensitivity to Fe deficiency as compared with the Col-0 plants with smaller rosette diameter and higher chlorosis level (Fig. 1). This observation was in line with the earlier study where Fe deficiency responses were found to be aggravated by reduced GSH content in *Arabidopsis* (Ramirez *et al.*, 2013; Shanmugam *et al.* 2015). The next approach was to identify the Fe

transporters and homeostasis related genes that might be responsible for this observation. Out of the 32 Fe transporters analyzed, 2 vacuole Fe exporters, *AtNRAMP3* and *AtNRAMP4*, and a chloroplast Fe importer, *AtPIC1* were found to be significantly down-regulated in the mutants, while 2 chloroplast Fe exporters, *AtYSL1* and *AtYSL3* were up-regulated (Fig.3-5). Several Fe homeostasis related genes were analyzed as well among which *AtFer1* was found to be down-regulated in the mutants. Exogenously altered GSH levels also supported this observation (Fig 6).

The altered expression of these organellar Fe transporters suggested a possible role of GSH in modulating the subcellular Fe homeostasis under Fe limited condition. The vacuole, during Fe sufficient condition stores the excess amount of Fe to rescue the cell from Fe mediated oxidative damage. This stored Fe is released under Fe limited condition to mitigate Fe deficiency responses in plants (Morrissey and Guerinot, 2009). On contrary, *AtPIC1*, a chloroplast Fe importer, was found to be up-regulated during Fe deficiency to maintain the Fe homeostasis in chloroplast (Duy *et al.*, 2005). In addition, *AtFer1* was reported to act as Fe reservoir in chloroplast and to diminish the Fe deficiency responses (Briat *et al.*, 2010). In a previous study, it was reported that *AtNRAMP3* and *AtNRAMP4* function as major vacuolar Fe exporters in germinating seeds where vacuolar reserve is the primary source of Fe (Bastow *et al.*, 2018). Further, it was demonstrated that the Fe mobilization into chloroplast was limited when the vacuolar Fe could not be retrieved. The expression of *AtFer1* was also reported to be significantly reduced in the *nramp3nramp4* mutant with perturbed vacuolar Fe efflux. In this study, GSH was found to positively regulate the expression of *AtNRAMP3*, *AtNRAMP4*, *AtPIC1* and *AtFer1* genes. This made us inquisitive if GSH can help in channelizing the Fe retrieved from vacuoles into the chloroplast in shoot under Fe deficient conditions. We, therefore, analyzed the Fe content in the vacuoles and the chloroplasts in the GSH depleted mutants. Surprisingly, both the vacuolar and chloroplast Fe contents were found to be lower in the mutants under Fe sufficient condition (Fig. 7). This lower Fe accumulation in the mutants can be attributed to their impaired Fe uptake due to reduced *AtIRT1* expression in the roots. On contrary, the vacuolar Fe content was found to be higher in the mutants while the chloroplast Fe content remained lower under DI condition. This observation strongly suggested that the GSH depleted mutants failed to efficiently retrieve the vacuolar Fe under DI condition and channelize them into the chloroplast.

GSH combines with NO leading to the formation of GSNO which acts as an important signaling intermediate. Earlier, GSNO was reported to act as a key modulator of Fe responsive genes in *Arabidopsis* (Koen *et al.*, 2012; Shanmugam *et al.* 2015; Kailasam *et al.*, 2018). This made us interested to dissect the role of GSNO in regulating these Fe responsive genes. The Col-0 and *pad2-1* plants, when fed with GSH or GSNO under DI condition showed marked increment in the expression of all 5 genes (Fig 8). On contrary, feeding the plants with GSNO/BSO combination under DI condition, did not display this augmented expression pattern as compared with the DI condition alone. Again, no induction in gene expression was observed in case of combined GSH/tungstate treatment even under DI condition. These observations suggested that GSH regulated the subcellular Fe homeostasis via a GSNO mediated pathway.

The next pertinent question was how this GSH-GSNO module induced the expression of these genes. To dissect this mechanism, 5 different transgenic lines harbouring *AtNRAMP3pro::GUS*, *AtNRAMP4pro::GUS*, *AtPIC1pro::GUS*, *AtFer1pro::GUS*, and *AtIRT1pro::GUS* constructs were generated and the transgenic plants were used for promoter analysis. Interestingly, the histochemical GUS assay confirmed that all the 5 promoters were activated in response to GSH or GSNO treatments. This strongly indicated that the GSH-GSNO module regulated the Fe responsive genes via transcriptional activation. Since neither GSH nor GSNO can directly bind to these promoters, this transcriptional activation presumably involved one or more TFs. Earlier reports have identified 17 bHLH TFs that are involved in regulating various Fe responsive genes in *Arabidopsis* (Yuan *et al.*, 2008; Gao *et al.*, 2019; 2020). Among them, *AtFIT1* (bHLH29, clade IIIa) and the clade Ib bHLH factors (bHLH38, bHLH39, bHLH100, bHLH101) were reported to regulate two crucial Fe responsive genes, *AtIRT1* and *AtFRO2* (Colangelo and Guerinot, 2004; Yuan *et al.*, 2008). Further, these TFs were found to be regulated directly or indirectly by GSNO (Darbani *et al.*, 2013; Kailasam *et al.*, 2018). This GSNO mediated regulation often involved S-nitrosylation of the TFs (Darbani *et al.*, 2013). We were curious if the rest of the 12 bHLH TFs could be regulated by GSNO as well and analyzed for the presence of putative S-nitrosylation sites. Seven out of these 12 TFs were found to contain at least one putative S-nitrosylation sites supporting the hypothesis for a GSNO-mediated regulation (Supplementary Fig. S5-6). Moreover, the identified Fe responsive genes, viz. *AtNRAMP3*, *AtNRAMP4*, *AtPIC1*, *AtIRT1* and *AtFer1* were found to contain conserved E-box motifs in their promoter regions

indicating the probable transcriptional regulation via the *S*-nitrosylated bHLH TFs (Supplementary Fig. S7). This remains an open area for in depth analysis in the future.

In summary, it can be postulated that during Fe deficiency the accumulation of GSH in cells can activate the vacuolar Fe exporters like *AtNRAMP3* and *AtNRAMP4* to facilitate Fe export from the vacuolar reserve. On the other hand, GSH was found to trigger the expression of chloroplast Fe importer, *AtPIC1* and Fe responsive gene *AtFer1* to maintain chloroplast Fe content during Fe deficiency in plants (Fig. 10). This regulation involved GSH-GSNO mediated transcriptional activation of these genes presumably via *S*-nitrosylation of different Fe responsive bHLH TFs.

## Supplementary data

Fig. S1. Expression of *AtIRT1* gene in Col-0 shoot under DI condition. 7 d old MS grown seedlings were transferred to DI medium and samples were collected after 0 d, 2 d, 5 d, 7 d, and 10 d of treatment.

Fig. S2. Perls-DAB staining of Col-0, *cad2-1* and *pad2-1* plants grown under MS condition.

Fig. S3. Response of *pad2-1* plants to exogenous GSH and DTT treatments. (A) Total GSH content. (B-F) Relative transcript abundance of the identified Fe responsive genes.

Fig. S4. Screening of transgenic lines harbouring (A) *CaMV35S::GUS*, (B) *AtPIC1pro::GUS*, (C) *AtNRAMP3pro::GUS*, (D) *AtIRT1pro::GUS*, (E) *AtFer1pro::GUS*, and (F) *AtNRAMP4pro::GUS* constructs.

Fig. S5. Prediction of putative *S*-nitrosylation sites in different Fe responsive bHLH TFs using GPS-SNO 1.0 Software and Centrimo 5.3.3 web server.

Fig. S6. Enrichment analysis for the presence of putative *S*-nitrosylation cysteine residues in different Fe responsive bHLH TFs.

Fig. S7. *In silico* promoter analysis of the identified Fe responsive genes for the presence of conserved E-box motif.

Table S1. List of primers used.

Table S2. Prediction of putative *S*-nitrosylation sites using GPS-SNO 1.0 software.

## Acknowledgement

This work has been supported by the Science and Engineering Research Board, Government of India [ECR/2017/000231] and Start up Grant, University Grant Commission, Government of India, India [F30-363/2017(BSR)]. We thank the central instrumentation facility of the Department of Botany, University of Calcutta and Department of Botany, Dr A. P. J. Abdul Kalam Government College. We thank Prof. Manoj Prasad, Staff Scientist VII, NIPGR, New Delhi for providing us the pCAMBIA1304 vector.

## Author Contributions

RD and SP conceived and designed the research plan; RS raised the transgenic lines, performed expression analysis, feeding experiments and GUS assay; SG standardized the plant growth and stress treatments, PK performed biochemical experiments, SS prepared the constructs; CR helped in maintaining the transgenic lines, DS performed *in silico* analysis; RD and SP analyzed the data and prepared the manuscript.

## References

- Anderson.** 1985. Determination of glutathione and glutathione disulfide in biological samples. *Methods in Enzymology* **113**, 548- 555.
- Bailey TL, Bodén M, Buske FA, Frith M, Grant CE, Clementi L, Ren J, Li WW, Noble WS.** 2009. MEME SUITE: tools for motif discovery and searching. *Nucleic Acids Research* **37**, 202-208.
- Bailey TL, Machanick P.** 2012. Inferring direct DNA binding from ChIP-seq. *Nucleic Acids Research* **40**, 128.
- Ball L, Accotto G, Bechtold U, Creissen G, Funck, D, Jimenez A, Kular B, Leyland N, Mejia-Carranza J, Reynolds H, Karpinski S, Mullineaux PM.** 2004. Evidence for a direct link between glutathione biosynthesis and stress defense gene expression in Arabidopsis. *Plant Cell* **16**, 2448–2262.
- Bashandy T, Guilleminot J, Vernoux T, Caparros-Ruiz D, Ljung, K, Meyer Y, Reichheld JP.** 2010. Interplay between the NADP-linked thioredoxin and glutathione systems in Arabidopsis auxin signaling. *Plant Cell* **22**, 376–391.

545 **Bastow EL, Vanesa S, Torre G, Maclean AE, Merlot S, Thomine S, Balk J.** 2018.  
546 Vacuolar Iron Stores Gated by NRAMP3 and NRAMP4 are the Primary Source of Iron in  
547 Germinating Seeds. *Plant Physiology* **177**, 1267–1276.

548 **Briat JF, Ravet K, Arnaud N, Duc C, Boucherez J, Touraine B, Cellier F, Gaymard F.**  
549 2010. New insights into ferritin synthesis and function highlight a link between iron  
550 homeostasis and oxidative stress in plants. *Annals of Botany* **105**, 811–822.

551 **Briat, JF, Dubos C, Gaymard F.** 2015. Iron nutrition, biomass production, and plant  
552 product quality. *Trends in Plant Science* **20**, 33–40.

553 **Cairns N, Pasternak M, Wachter A, Cobbett C, Meyer A.** 2006. Maturation of  
554 *Arabidopsis* seeds is dependent on glutathione biosynthesis within the embryo. *Plant*  
555 *Physiology* **141**, 446–455.

556 **Chen WW, Yang JL, Qin C, Jin CW, Mo JH, Ye T, Zheng SJ.** 2010. Nitric oxide acts  
557 downstream of auxin to trigger root ferric chelate reductase activity in response to iron  
558 deficiency in *Arabidopsis*. *Plant Physiology* **154**, 810– 819.

559 **Chu HH, Chiecko J, Punshon T, Lanzirotti A, Lahner B, Salt DE, Walker EL.** 2010.  
560 Successful reproduction requires the function of *Arabidopsis* YELLOW STRIPE-LIKE1 and  
561 YELLOW STRIPE-LIKE3 metal-nicotianamine transporters in both vegetative and  
562 reproductive structures. *Plant Physiology* **154**, 197–210.

563 **Clemens S, Kim E, Neumann D, Schroeder J.** 1999. Tolerance to toxic metals by a gene  
564 family of phytochelatin synthases from plants and yeast. *EMBO Journal* **18**, 3325–3333.

565 **Clough, SJ, Bent AF.** 1998. Floral dip: a simplified method for *Agrobacterium*-mediated  
566 transformation of *Arabidopsis thaliana*. *Plant Journal* **16**, 735–743.

567 **Colangelo EP, Guerinot, ML.** 2004. The essential basic helix-loop-helix protein FIT1 is  
568 required for the iron deficiency response. *Plant Cell* **16**, 3400– 3412.

569 **Curie C, Alonso JM, Marie LE , Ecker JR, Briat JF.** 2000. Involvement of NRAMP1  
570 from *Arabidopsis thaliana* in iron transport. *Biochemical Journal* **347**, 749–755.

571 **Darbani B, Briat JF, Holm PB, Husted S, Noeparvar S, Borg S.** 2013. Dissecting plant  
572 iron homeostasis under short and long-term iron fluctuations. *Biotechnology Advances* **31**,  
573 1292–1307.

574 **Datta R, Kumar D, Sultana A, Hazra S, Bhattacharyya D, Chattopadhyay S.** 2015.  
575 Glutathione Regulates 1-Aminocyclopropane-1-Carboxylate Synthase Transcription via  
576 WRKY33 and 1-Aminocyclopropane-1-Carboxylate Oxidase by Modulating Messenger  
577 RNA Stability to Induce Ethylene Synthesis during Stress. *Plant Physiology* **169**, 2963–2981.

578 **Datta R, Chattopadhyay S.** 2015. Changes in the proteome of pad2.1, a glutathione  
579 depleted Arabidopsis mutant, during *Pseudomonas syringae* infection. *Journal of*  
580 *Proteomics* **126**, 82–93.

581

582 **Duy D, Gerhard W, Meda AR, Wirén NV, Soll J, Philippar K.** 2007. PIC1, an Ancient  
583 Permease in Arabidopsis Chloroplasts, Mediates Iron Transport. *Plant Cell* **19**, 986–1006.

584 **Eroglu S, Meier B, Wirén NV, Peiter E.** 2016. The Vacuolar Manganese Transporter MTP8  
585 Determines Tolerance to Iron Deficiency-Induced Chlorosis in Arabidopsis. *Plant Physiology*  
586 **170**, 1030–1045.

587 **Foyer CH, Halliwell B.** 1976. The presence of glutathione and glutathione reductase in  
588 chloroplasts: A proposed role in ascorbic acid metabolism. *Planta* **133**, 21–25.

589 **Frottin F, Espagne C, Traverso J, Mauve C, Valot B, Lelarge-Trouverie C, Zivy M,**  
590 **Noctor G, Meinnel T, Giglione C.** 2009. Cotranslational proteolysis dominates glutathione  
591 homeostasis to support proper growth and development. *Plant Cell* **21**, 3296–3314.

592 **Gao F, Robe K, Bettembourg M, Navarro N, Rofidal V, Santoni V, Gaymard**  
593 **F, Florence V, Roschztardt H, Izquierdo E, Dubos C.** 2020. The Transcription Factor  
594 bHLH121 Interacts with bHLH105 (ILR3) and Its Closest Homologs to Regulate Iron  
595 Homeostasis in Arabidopsis. *Plant Cell* **32**, 508–524.

596 **Gao F, Robe K, Gaymard F, Izquierdo E, Dubos B.** 2019. The Transcriptional control of  
597 iron homeostasis in plants: a tale of bHLH transcription factors? *Frontiers in Plant Science*  
598 **10**, 1-8.

599 **García MJ, Lucena C, Romera FJ, Alcántara E, Vicente P.** 2010. Ethylene and nitric  
600 oxide involvement in the up-regulation of key genes related to iron acquisition and  
601 homeostasis in Arabidopsis. *Journal of Experimental Botany* **61**, 3885–3899.

602 **Ghanta S, Bhattacharyya D, Sinha, R, Banerjee A, Chattopadhyay S.** 2011. Nicotiana  
603 tabacum overexpressing  $\gamma$ -eCS exhibits biotic stress tolerance likely through NPR1-  
604 dependent salicylic acid-mediated pathway. *Planta* **233**, 895–910.

605 **Ghanta S, Datta R, Bhattacharyya D, Sinha R, Kumar D, Hazra S, Bose Mazumdar A,**  
606 **Chattopadhyay S.** 2014. Multistep involvement of glutathione with salicylic acid and  
607 ethylene to combat environmental stress. *Journal of Plant Physiology* **171**, 940-950.

608 **Glazebrook J, Ausubel FM.** 1994. Isolation of phytoalexin-deficient mutants of *Arabidopsis*  
609 *thaliana* and characterization of their interactions with bacterial pathogens. *Proceedings of the*  
610 *National Academy of Sciences, USA* **91**, 8955– 8959.

611 **Glazebrook J, Zook M, Mert F, Kagan I, Rogers EE, Crute IR, Holub EB,**  
612 **Hammerschmidt R, Ausubel FM.** 1997. Phytoalexin-deficient mutants of *Arabidopsis*  
613 reveal that PAD4 encodes a regulatory factor and that four PAD genes contribute to downy  
614 mildew resistance. *Genetics* **146**, 381–392.

615 **Grill E, Löffler S, Winnacker E, Zenk M.** 1989. Phytochelatins, the heavy-metal-binding  
616 peptides of plants, are synthesized from glutathione by a specific gamma-glutamylcysteine  
617 dipeptidyl transpeptidase (phytochelatase synthase). *Proceedings of the National Academy of*  
618 *Sciences, USA* **86**, 6838–6842.

619 **Han Y, Chaouch S, Mhamdi A, Queval G, Zechmann B, Noctor G.** 2013. Functional  
620 analysis of *Arabidopsis* mutants points to novel roles for glutathione in coupling H<sub>2</sub>O<sub>2</sub> to  
621 activation of salicylic acid accumulation and signaling. *Antioxidants & Redox Signaling* **18**,  
622 2106–2121.

623 **Hider RC, Kong XL.** 2011. Glutathione: A key component of the cytoplasmic labile iron  
624 pool. *Biometals* **24**, 1179–1187.

625 **Jefferson RA, Kavangh TA, Bevan MW.** 1987. Gus fusions:  $\beta$ -glucuronidase as a sensitive  
626 and versatile gene fusion marker in higher plants. *EMBO Journal* **6**, 3901-3907.

627 **Jeong J, Connolly EL.** 2009. Iron uptake mechanisms in plants: functions of the FRO family  
628 of ferric reductases. *Plant Science* **176**, 709–714.

629 **Jiang SL, Wu JG, Feng Y, Yang XE, Shi CH.** 2007. Correlation analysis of mineral  
630 element contents and quality traits in milled rice (*Oryza sativa* L.). *Journal of Agricultural*  
631 *and Food Chemistry* **55**, 9608–9613.

632 **Jobe T, Sung D, Akmakjian G, Pham A, Komives E, Mendoza C, C6zatl DG Schroeder**  
633 **JL.** 2012. Feedback inhibition by thiols outranks glutathione depletion: A luciferase-based  
634 screen reveals glutathione-deficient  $\gamma$ -eCS and glutathione synthetase mutants impaired in  
635 cadmium-induced sulfate assimilation. *Plant Journal* **70**, 783–795.

636 **Kailasam S, Wang Y, Lo JC, Chang HF, Yeh KC.** 2018. S-nitrosoglutathione works  
637 downstream of nitric oxide to mediate iron deficiency signaling in Arabidopsis. *Plant Journal*  
638 **94**, 157–168.

639 **Kim SA, Punshon T, Lanzirotti A, Li L, Alonso JM, Ecker JR, Kaplan J, Mary L.** 2006.  
640 Localization of iron in Arabidopsis seed requires the vacuolar membrane transporter VIT1.  
641 *Science* **314**, 1295-1298.

642 **Kleffmann T, Russenberger D, Zychlinski A, Christopher W, Sjolander K, Gruissem**  
643 **W, Baginsky S.** 2004. The Arabidopsis thaliana chloroplast proteome reveals pathway  
644 abundance and novel protein functions. *Current Biology* **14**, 354–362.

645 **Koen E, Szymańska K, Klinguer A, Dobrowolska G, Besson-Bard A, Wendehenne D.**  
646 2012. Nitric oxide and glutathione impact the expression of iron uptake- and iron transport-  
647 related genes as well as the content of metals in A. thaliana plants grown under iron  
648 deficiency. *Plant Signaling and Behavior* **7**, 1246-1250.

649 **Kumar C, A Igbaria, D'Autreaux B , Planson AG, Junot C, Godat E, Bachhawat AK,**  
650 **Moisan AD, Toledano MB.** 2011. Glutathione revisited: a vital function in iron metabolism  
651 and ancillary role in thiol-redox control. *EMBO Journal* **30**, 2044-2056.

652 **Lanquar V, Lelievre F, Bolte S, Hames C, Alcon C, Neumann D, Vansuyt G, Curie C,**  
653 **Schroder A, Kramer U.** 2005. Mobilization of vacuolar iron by Atnramp3 and Atnramp4 is  
654 essential for seed germination on low iron. *EMBO Journal* **24**, 4041–4051.

655 **Lichtenthaler HK.** 1987. Chlorophylls and carotenoids: pigments of photosynthetic  
656 biomembranes. *Methods Enzymology* **148**, 350–382.

657 **Meiser J, Lingam S, Bauer P.** 2011. Posttranslational regulation of iron deficiency basic-  
658 helix-loop-helix transcription factor FIT is affected by iron and nitric oxide. *Plant Physiology*  
659 **157**, 2154–2166.

660 **Morrissey J, Guerinot ML.** 2009. Iron uptake and transport in plants: The good, the bad,  
661 and the ionome. *Chemical Review* **10**, 4553–4567.

662 **Murashige T, Skoog F.** 1962. A revised medium for rapid growth and bio assays with  
663 tobacco tissue cultures. *Physiologia Plantarum* **15**, 473-497.

664 **Parisy V, Poinssot B, Owsianowski L, Buchala A, Glazebrook J, Mauch F.** 2007.  
665 Identification of PAD2 as a gamma-glutamylcysteine synthetase highlights the importance of  
666 glutathione in disease resistance of Arabidopsis. *Plant Journal* **49**, 159–172.

667 **Qiu B, Zeng F, Cai S, Wu X, Haider S, Wu F, Zhang G.** 2013. Alleviation of chromium  
668 toxicity in rice seedlings by applying exogenous glutathione. *Journal of Plant Physiology*  
669 **170**, 772–779.

670 **Queval G, Thominet D, Vanacker H, Miginiac-Maslow M, Gakiere B, Noctor G.** 2009.  
671 H<sub>2</sub>O<sub>2</sub>-activated upregulation of glutathione in Arabidopsis involves induction of genes  
672 encoding enzymes involved in cysteine synthesis in the chloroplast. *Molecular Plant* **2**, 344–  
673 356.

674 **Ramirez L, Bartoli CG, Lamattina L.** 2013. Glutathione and ascorbic acid protect  
675 Arabidopsis plants against detrimental effects of iron deficiency. *Journal of Experimental*  
676 *Botany* **64**, 3169-3178.

677 **Ramirez L, Simontacchi M, Murgia I, Zabaleta E, Lamattina L.** 2011. Nitric oxide,  
678 nitrosyl iron complexes, ferritin and frataxin: a well equipped team to preserve plant iron  
679 homeostasis. *Plant Science* **181**, 582– 592.

680 **Reichheld JP, Khafif M, Riondet C, Droux M, Bonnard G, Meyer Y.** 2007. Inactivation  
681 of thioredoxin reductases reveals a complex interplay between thioredoxin and glutathione  
682 pathways in Arabidopsis development. *Plant Cell* **19**, 1851–1865.

683 **Requejo R, Tena M.** 2012. Influence of glutathione chemical effectors in the response of  
684 maize to arsenic exposure. *Journal of Plant Physiology* **169**, 649–656.

685 **Robinson NJ, Procter CM, Connolly EL, Guerinot ML.** 1999. A ferric-chelate reductase  
686 for iron uptake from soils. *Nature* **397**, 694–697.

687 **Roschztardt H, Conéjéro G, Curie C, Mari S.** 2009. Identification of the endodermal  
688 vacuole as the iron storage compartment in the Arabidopsis embryo. *Plant Physiology* **151**,  
689 1329–1338.

690 **Schützendübel A, Schwanz, P, Teichmann T, Gross K, Rosemarie LH, Godbold D, Polle**  
691 **A.** 2001. Cadmium-induced changes in antioxidative systems, hydrogen peroxide content,  
692 and differentiation in Scots pine roots. *Plant Physiology* **127**, 887–898.

693 **Shanmugam V, Tsednee M, Yeh KC.** 2012. ZINC TOLERANCE INDUCED BY IRON 1  
694 reveals the importance of glutathione in the cross-homeostasis between zinc and iron in  
695 *Arabidopsis thaliana*. *Plant Journal* **69**, 1006–1017.

696 **Shanmugam V, Wang YW, Tsednee M, Karunakaran K, Yeh KC.** 2015. Glutathione  
697 plays an essential role in nitric oxide-mediated iron-deficiency signaling and  
698 iron-deficiency tolerance in *Arabidopsis*. *Plant Journal* **84**, 464-477.

699 **Shimoni SE, Hassidim M, Yuval-Neah N, Keren N.** 2010. Disruption of Nap14, a  
700 plastid-localized non-intrinsic ABC protein in *Arabidopsis thaliana* results in the  
701 over-accumulation of transition metals and in aberrant chloroplast structures. *Plant Cell &*  
702 *Environment* **33**, 1029–1038.

703 **Taylor NL, Millar AH.** 2016. Isolation of Plant Organelles and Structures. *Methods in*  
704 *Molecular Biology* **1511**, 113-118.

705 **Thomine S, Lelievre F, Debarbieux E, Schroeder JI, Brygøo HB.** 2003. AtNRAMP3, a  
706 multispecific vacuolar metal transporter involved in plant responses to iron deficiency. *Plant*  
707 *Journal* **34**, 685-695.

708 **Toledo-Ortiz G, Huq E, Quail PH.** 2003. The *Arabidopsis* basic/helix-loop-helix  
709 transcription factor family. *Plant Cell* **15**, 1749–1770.

710 **Vatamaniuk OK, Mari S, Lu YP, Rea PA.** 1999. AtPCS1, a phytochelatin synthase from  
711 *Arabidopsis*: Isolation and in vitro reconstitution. *Proceedings of the National Academy of*  
712 *Sciences, USA* **96**, 7110–7115.

713 **Vernoux T, Wilson R, Seeley K, Reichheld J, Muroy S, Brown S, Maughan SC, Cobbett**  
714 **SC, Montagu MV, Inzé D, May MJ, Sung Z.** 2000. The ROOT  
715 MERISTEMLESS1/CADMIUM SENSITIVE2 gene defines a glutathione-dependent  
716 pathway involved in initiation and maintenance of cell division during postembryonic root  
717 development. *Plant Cell* **12**, 97–110.

718 **Vert G, Grotz N, Dédaldéchamp F, Gaymard F, Guerino ML, Briat JF, Curie C.** 2002.  
719 IRT1, an Arabidopsis Transporter Essential for Iron Uptake from the Soil and for Plant  
720 Growth. *Plant Cell* **22**, 376–391.

721 **Waters BM, Chu HH, DiDonato RJ, Roberts LA, Easley RB, Lahner B, Salt DE, Walker**  
722 **EL.** 2006. Mutations in Arabidopsis yellow stripe-like1 and yellow stripe-like3 reveal their  
723 roles in metal ion homeostasis and loading of metal ions in seeds. *Plant Physiology* **141**,  
724 1446–1458.

725 **Xue Y, Liu Z, Gao X, Jin C, Wen L, Yao X, Ren J.** 2010. GPS-SNO: Computational  
726 prediction of protein S-nitrosylation sites with a modified GPS algorithm. *Plos One* **5**,  
727 e11290.

728

729 **Yuan Y, Wu H, Wang N, Li, J, Zhao W, Du J, Wang D, Ling HQ.** 2008. FIT interacts  
730 with AtbHLH38 and AtbHLH39 in regulating iron uptake gene expression for iron  
731 homeostasis in Arabidopsis. *Cell Research* **18**, 385–397.

732 **Zeng F, Qiu B, Wu X, Niu S, Wu F, Zhang G.** 2012. Glutathione-mediated alleviation of  
733 chromium toxicity in rice plants. *Biological Trace Element Research* **148**, 255–263.

734

## Figure Legends

**Fig. 1. Morphological response of Col-0, *cad2-1* and *pad2-1* plants in response to Fe deficient conditions.** 7 d old MS grown seedlings were exposed to MI and DI condition for 7 d and morphological parameters were recorded. (A) Shoot and (B) root morphology, (C) Rosette diameter, (D) primary root length, (E) Lateral root density, and (F) Total chlorophyll content. Results were represented as mean±SEM (n=3). Statistical differences between the Col-0, *cad2-1* and *pad2-1* were denoted by asterisks at P<0.05 (\*), P<0.01 (\*\*), P< 0.001 (\*\*\*), and P< 0.0001 (\*\*\*\*).

**Fig. 2. Biochemical analyses of Col-0, *cad2-1* and *pad2-1* plants in response to Fe deficient conditions.** 7 d old MS grown seedlings were exposed to MI and DI condition for 7 d and biochemical parameters were recorded. (A) Shoot Fe content, (B) Shoot total GSH content, (C) Shoot GSH:GSSG ratio, (D) Root Fe content, (E) Root total GSH content, and (F) Root GSH:GSSG ratio. Results were represented as mean±SEM (n=3). Statistical differences between the Col-0, *cad2-1* and *pad2-1* were denoted by asterisks at P<0.05 (\*), P< 0.001 (\*\*\*), and P< 0.0001 (\*\*\*\*).

**Fig. 3. Expression analysis of different Fe transporters in Col-0, *cad2-1* and *pad2-1* plants.** 14 d old MS grown plants were used for qRT-PCR analysis to analyse the relative transcript abundance of various Fe transporter genes from shoot tissue. Results were represented as mean±SEM (n=3). Statistical differences between the Col-0, *cad2-1* and *pad2-1* were denoted by asterisks at P<0.05 (\*), and P< 0.01 (\*\*).

**Fig. 4. Expression analysis of different Fe homeostasis related genes in Col-0, *cad2-1* and *pad2-1* plants.** 14 d old MS grown plants were used for qRT-PCR analysis to analyse the relative transcript abundance of various Fe homeostasis related genes from shoot tissue. Results were represented as mean±SEM (n=3). Statistical differences between the Col-0, *cad2-1* and *pad2-1* were denoted by asterisks at P<0.05 (\*), and P< 0.01 (\*\*).

**Fig. 5. Expression analysis of the identified Fe responsive genes in Col-0, *cad2-1* and *pad2-1* plants under DI condition.** 7 d old MS grown seedlings were exposed to DI condition for 7 d and were used for qRT-PCR analysis. Results were represented as mean±SEM (n=3). Statistical differences between Col-0, *cad2-1* and *pad2-1* were denoted by asterisks at P<0.05 (\*), P< 0.01 (\*\*), and P<0.0001 (\*\*\*\*).

**Fig. 6. Expression analysis of the identified Fe responsive genes in Col-0 plants in response to exogenously altered GSH level.** 15 d old MS grown plants were treated with 100  $\mu$ M GSH, or 1 mM BSO, or 5 mM DTT solutions. Control plants were maintained in half strength MS medium for the entire duration. Shoot samples collected from each set were used for qRT-PCR analysis. Results were represented as mean $\pm$ SEM (n=3). Statistical differences between the control, +GSH, +BSO and +DTT plants were denoted by asterisks at P<0.05 (\*), P<0.01 (\*\*), P< 0.001 (\*\*\*), and P< 0.0001 (\*\*\*\*).

**Fig. 7. Estimation of organellar Fe content from Col-0, *cad2-1* and *pad2-1* plants under MS and DI conditions.** 7 d old MS grown seedlings were exposed to DI condition for 7 d. Control plants were maintained in the MS medium for the entire period. Chloroplasts and vacuoles were isolated from the samples and used for Fe content estimation. (A) Chloroplast Fe content, and (B) Vacuolar Fe content. Results were represented as mean $\pm$ SEM (n=3). Statistical differences between Col-0, *cad2-1* and *pad2-1* were denoted by asterisks at P<0.01 (\*\*), P< 0.001 (\*\*\*), and P< 0.0001 (\*\*\*\*).

**Fig. 8. Expression analysis of the identified Fe responsive genes in Col-0 and *pad2-1* plants in response to chemical treatments.** 7 d old seedlings were transferred to DI condition for 7 d with or without GSH or GSNO or GSH/tungstate combination or GSNO/BSO combination. Control plants were maintained in half strength MS medium for the entire duration. Shoot samples collected from each set were used for qRT-PCR analysis. Results were represented as mean $\pm$ SEM (n=3). Statistical differences between the different set of treatments were denoted by asterisks at P<0.05 (\*), P<0.01 (\*\*), P< 0.001 (\*\*\*), and P< 0.0001 (\*\*\*\*).

**Fig. 9. Promoter analysis of the identified Fe responsive genes.** The seedlings of different transgenic lines were exposed to GSH or GSNO treatment and used to analyse their promoter activity by histochemical GUS assay and qRT-PCR analysis for *GUS* gene expression. The DI condition was used as a positive control. (A) *proNRAMP3* (harbouring *AtNRAMP3pro::GUS* construct), (B) *proNRAMP4* (harbouring *AtNRAMP4pro::GUS* construct), (C) *proFer1* (harbouring *AtFer1pro::GUS* construct), (D) *proPIC1* (harbouring *AtPIC1pro::GUS* construct), and (E) *proIRT1* (harbouring *AtIRT1pro::GUS* construct). A control transgenic line harbouring the *CaMV35S::GUS* construct was used as a negative control (E). Representative images of histochemical GUS staining were presented. The experiment was independently repeated thrice. For relative transcript abundance, results were

represented as mean $\pm$ SEM (n=3). Statistical differences between the MS, DI, +GSH, and +GSNO plants were denoted by asterisks at P<0.05 (\*), P<0.01 (\*\*), P< 0.001 (\*\*\*), and P< 0.0001 (\*\*\*\*).

**Fig. 10. Model for GSH mediated regulation of subcellular Fe homeostasis under Fe limited condition.** Fe deficiency leads to the accumulation of GSH in cells. GSH then activates the vacuolar Fe exporters, *AtNRAMP3* and *AtNRAMP4*, to facilitate release of Fe from the vacuolar reserve. GSH also induces the chloroplast Fe importer, *AtPIC1*, along with *AtFer1* which aids in channelizing the released Fe into the chloroplast. This GSH mediated modulation involves transcriptional induction via GSNO, presumably by S-nitrosylation of different Fe responsive bHLH TFs.

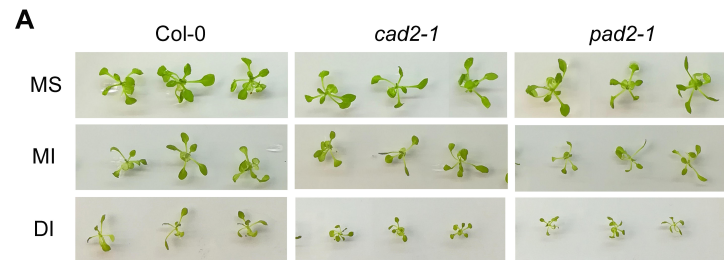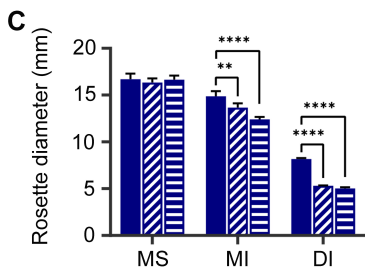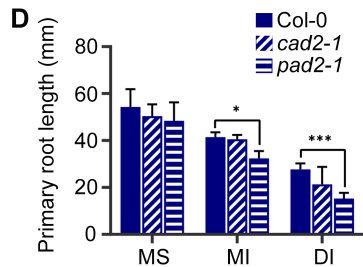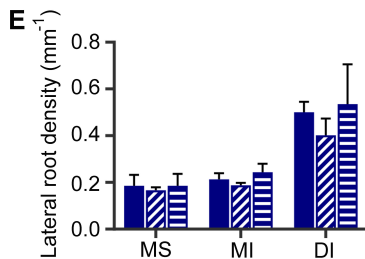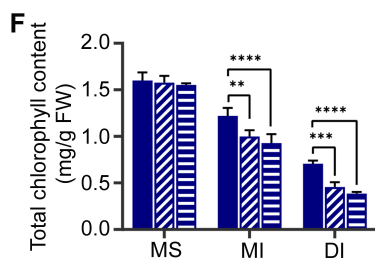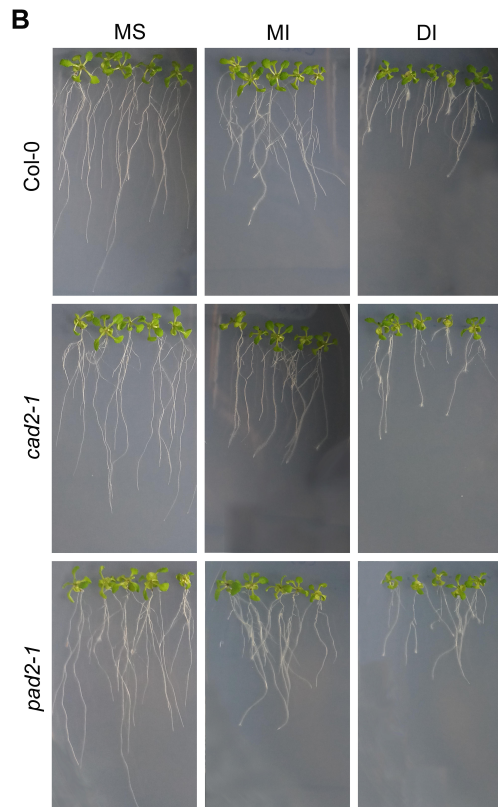

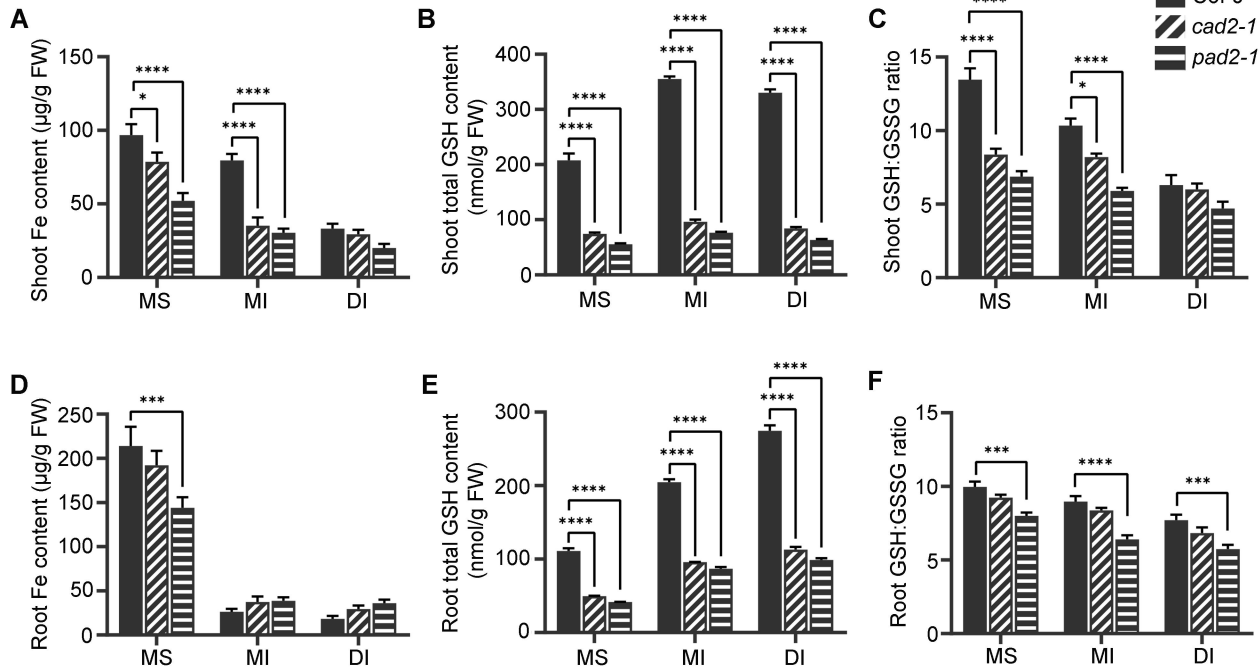

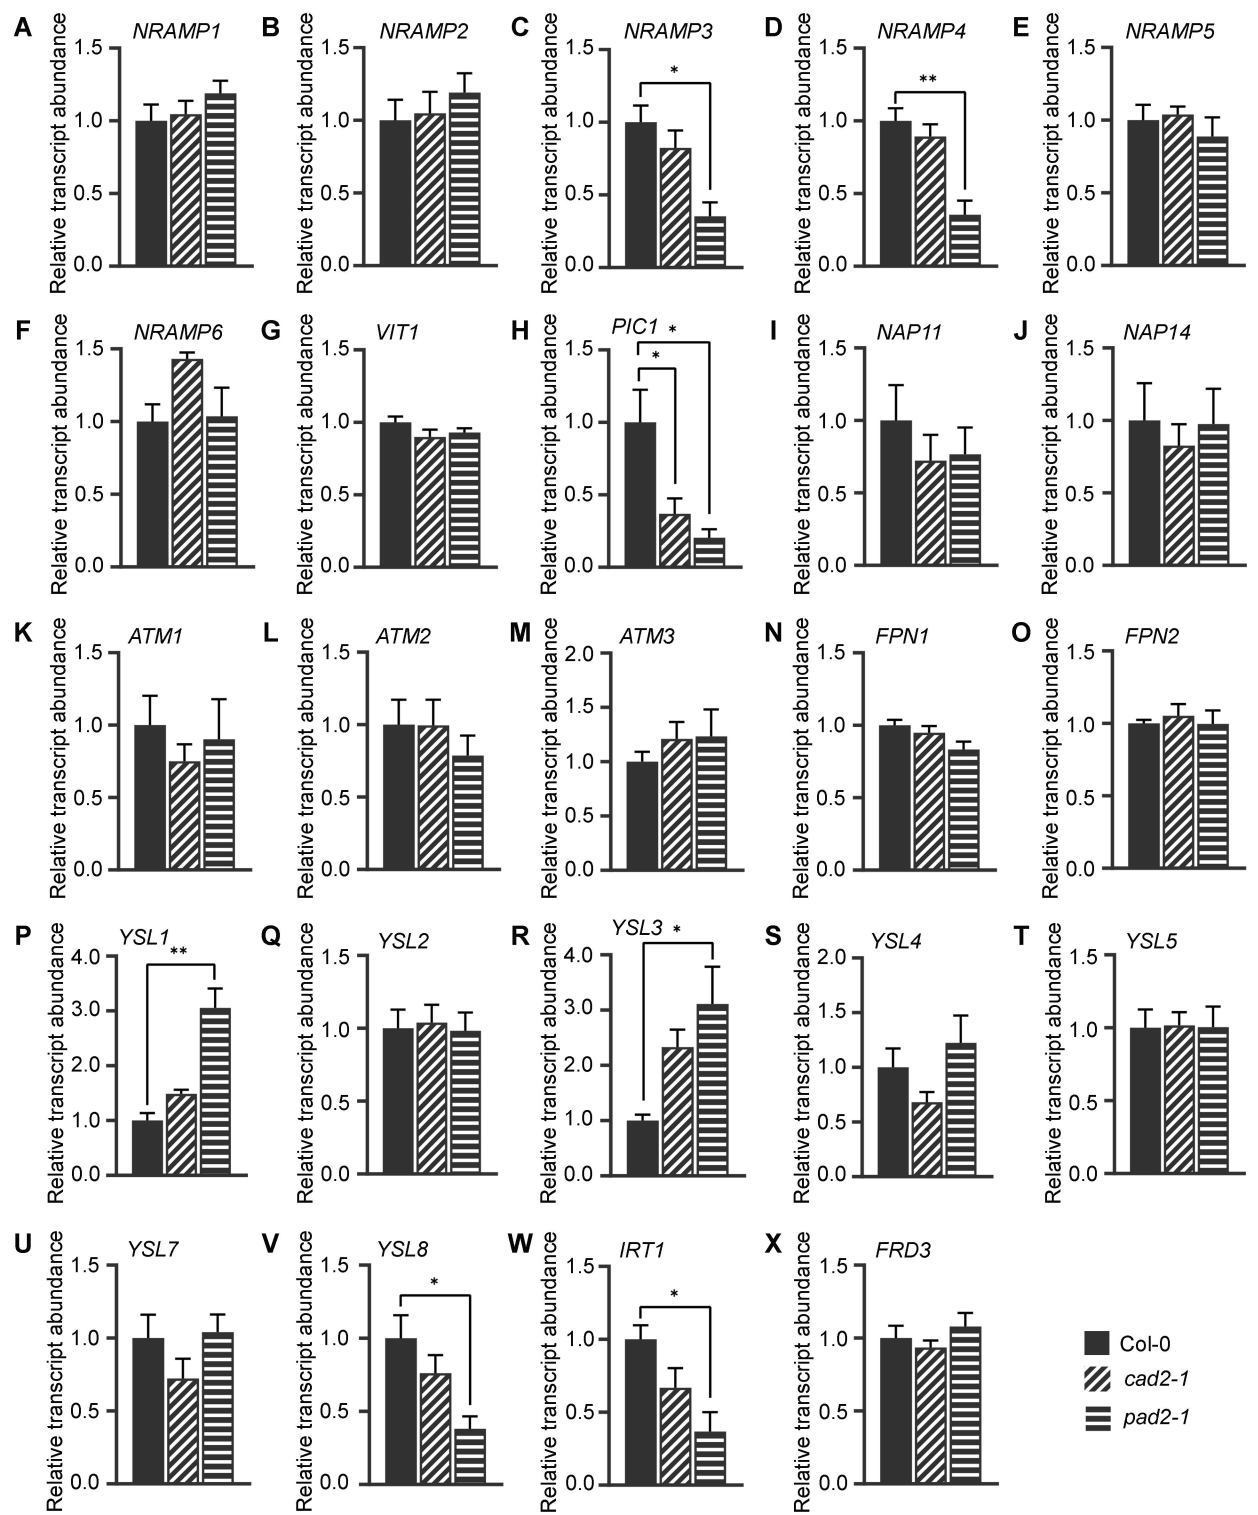

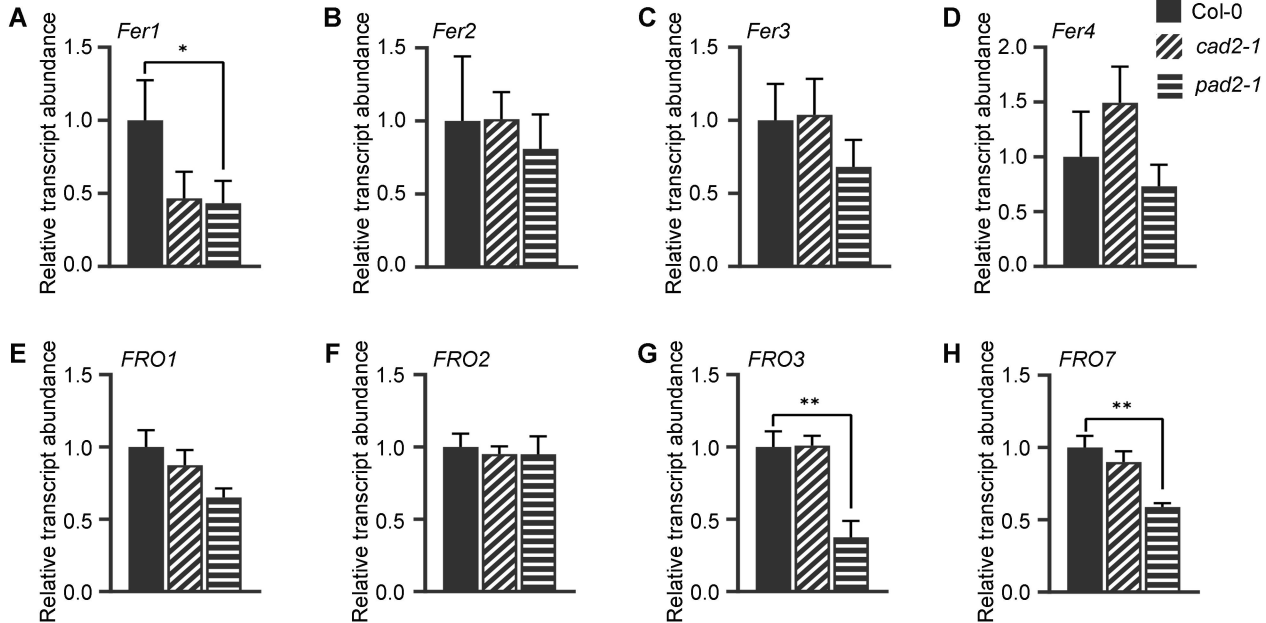

**A**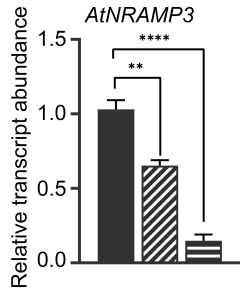**B**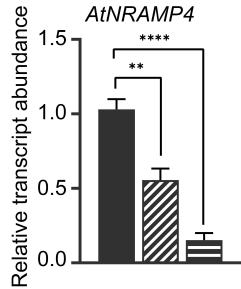**C**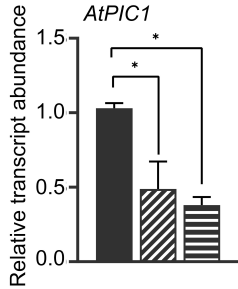**D**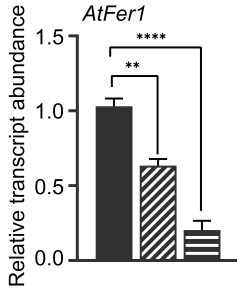**E**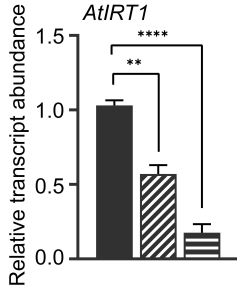

Col-0

*cad2-1* *pad2-1*

Control  
+GSH  
+BSO  
+DTT

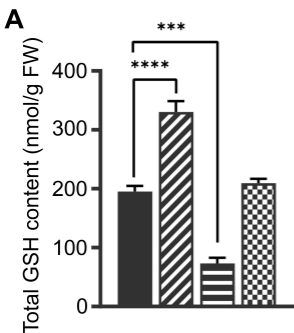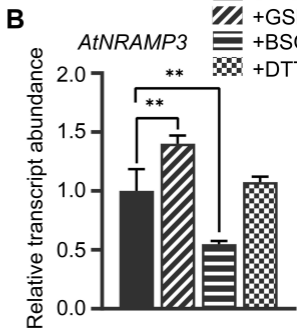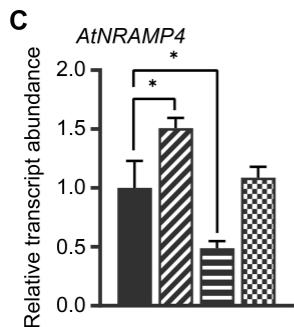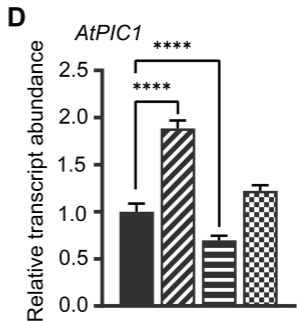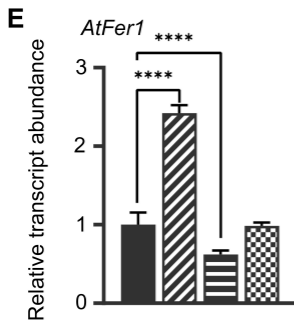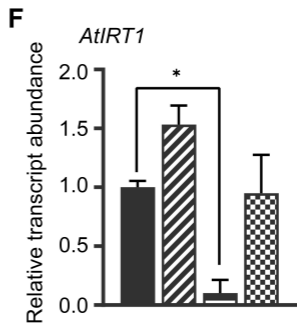

**A**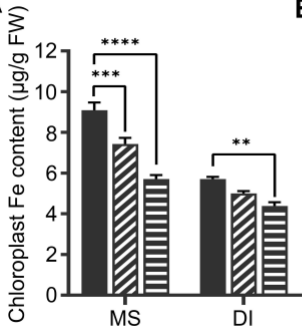**B**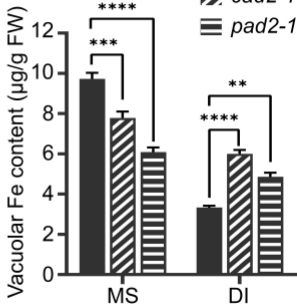

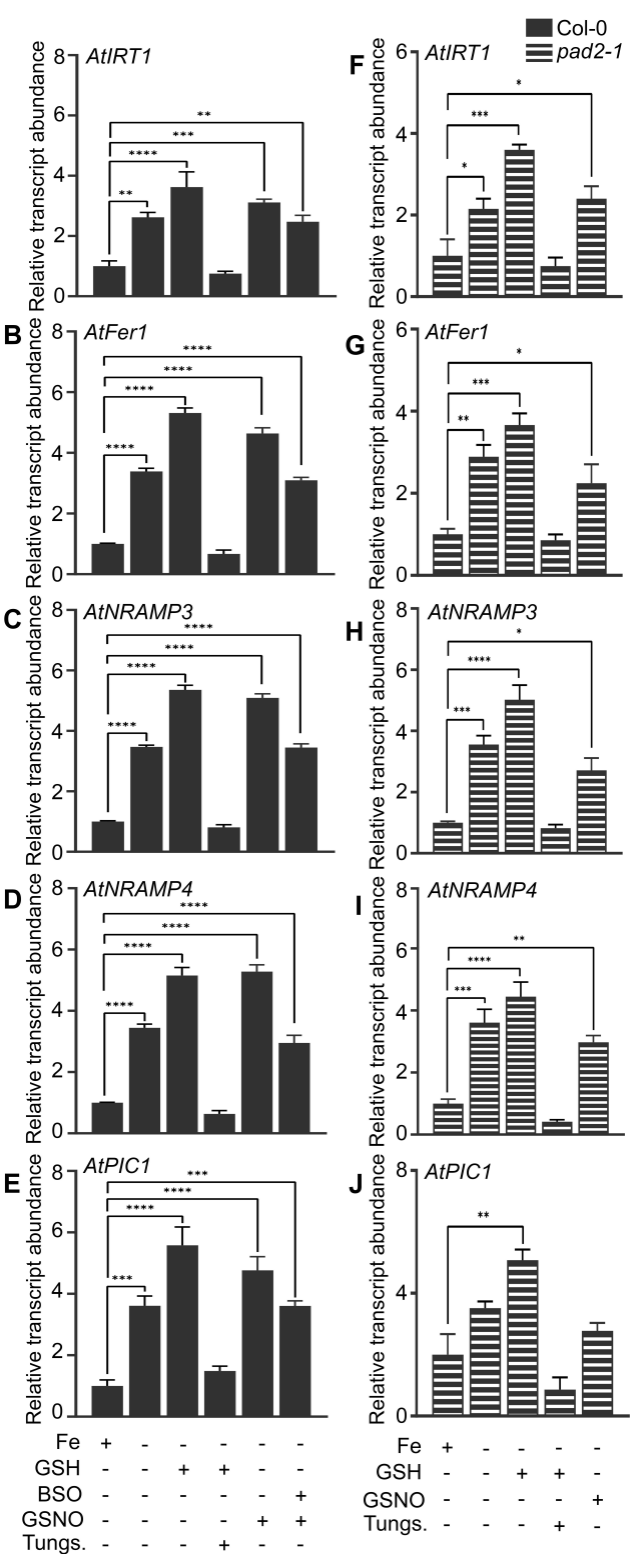

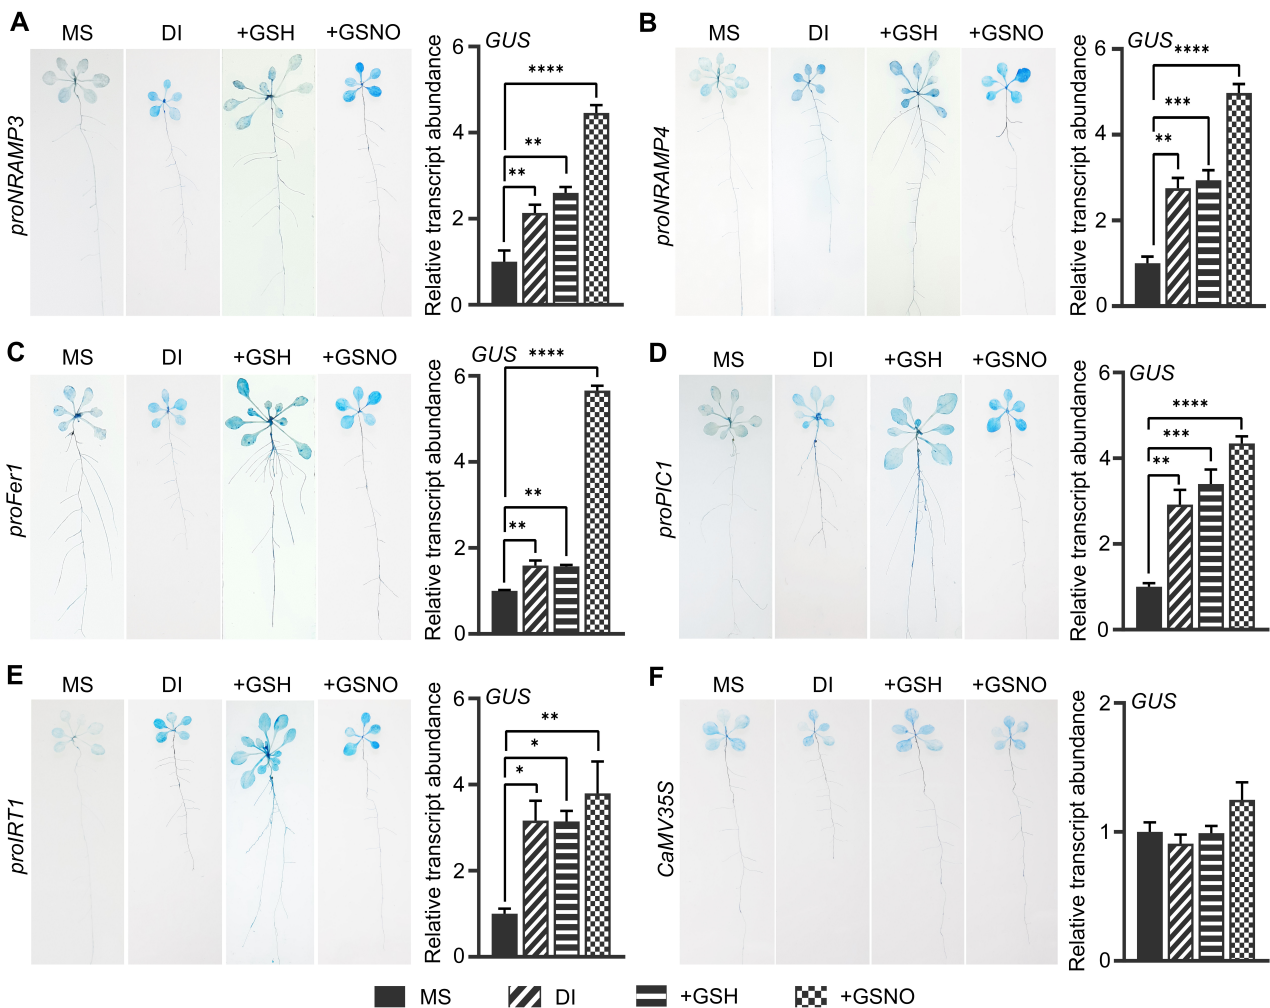

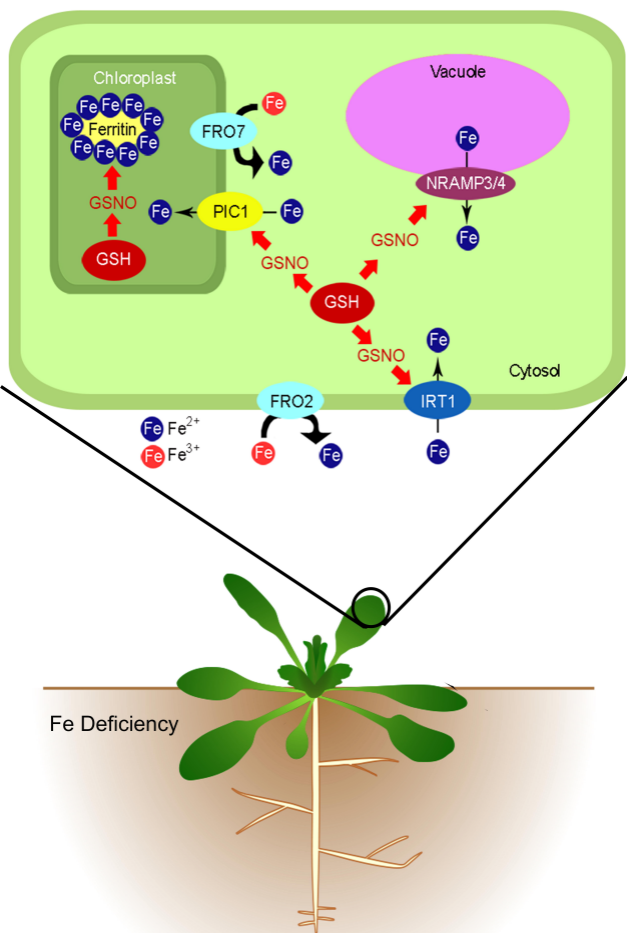

Source: http://biorxiv.org/content/10.1101/2021.05.09.443283v1.full.pdf
